# Supplementary material
Source: publisher site journal article supplement (https://www.dovepress.com/article/391769)
Supplement: Supplementary file 1 [file get_supplementary_file.php]

# **Supplementary material**

Supplementary Table 1. Utilities for each treatment in pre-progression and post-progression state

| **State** | **Treatment** | **Utility** | **Source** |
| --- | --- | --- | --- |
| **Pre-Progression** | Palbociclib + Fulvestrant | 0,728 | Utility calculated based on Lloyd et al. 2006 12 |
| Ribociclib + Fulvestrant | 0,725 | Utility calculated based on Lloyd et al. 2006 12 |
| Abemaciclib + Fulvestrant | 0,724 | Utility calculated based on Lloyd et al. 2006 12 |
| **Post-progression** | Active treatment | 0,454 | Utility calculated based on Lloyd et al. 2006 12 |
| BSC | 0,454 | Utility calculated based on Lloyd et al. 2006 12 |

**Supplementary Table 2. Unit costs**

| **Category** | **Item** | **Unit cost** | **Source** |
| --- | --- | --- | --- |
| **Second-line treatment-related costs** | Palbociclib | € 1.440 | So.Re.Sa. S.p.a., SISTEMA DINAMICO DI ACQUISIZIONE FORNITURA DI FARMACI ED EMODERIVATI  XXII APPALTO SPECIFICO, 2020 |
| Fulvestrant | € 39 | So.Re.Sa. S.p.a., SISTEMA DINAMICO DI ACQUISIZIONE FORNITURA DI FARMACI ED EMODERIVATI  XXII APPALTO SPECIFICO, 2020 |
| Ribociclib | € 1.444 | So.Re.Sa. S.p.a., SISTEMA DINAMICO DI ACQUISIZIONE FORNITURA DI FARMACI ED EMODERIVATI  XXII APPALTO SPECIFICO, 2020 |
| Abemaciclib | € 720 | So.Re.Sa. S.p.a., SISTEMA DINAMICO DI ACQUISIZIONE FORNITURA DI FARMACI ED EMODERIVATI  XXII APPALTO SPECIFICO, 2020 |
| **Adverse events costs** | Non-febrile neutropenia | € 3 | Tariffario Nomenclatore, emocromo 90.62.2 17 |
| Stomatitis | € 0 | KOL – expert opinion |
| Leukopenia | € 3 | Tariffario Nomenclatore, emocromo 90.62.2 17 |
| Anemia | € 77 | Tariffario Nomenclatore, emocromo 90.62.2 e trasfusione 99.07.1 e sacca Accordo-CSR-20.10.2015 17 |
| Fatigue | € 0 | KOL – expert opinion |
| Arthralgia | € 3 | FARMADATI Italia software Tunnel® 19 |
| Thrombocytopenia | € 15 | Tariffario Nomenclatore, emocromo 90.62.2 e trasfusione 99.07.1 e sacca Accordo-CSR-20.10.2015 17 |
| Nausea | € 960 | TUC, DRG 183 18, FARMADATI Italia software Tunnel® 19 |
| Decreased appetite | € 0 | KOL – expert opinion |
| Hepatobiliary toxicity | € 587 | TUC, DRG 206 18, FARMADATI Italia software Tunnel®19 |
| Diarrhea | € 961 | TUC, DRG 183 18, FARMADATI Italia software Tunnel®19 |
| Thromboembolism | € 1 | KOL – expert opinion |
| QTC | € 974 | TUC, DRG 13918 |
| Vomiting | € 959 | TUC, DRG 18318 |
| **Terminal care costs** | Hospital | € 2.839 | TUC, DRG (diag 1749, drg 274) 18 |
| Hospice | € 3.983 | Tariffe Lazio (SAN_DCA_U00411_13_09_2017)21 |
| Home | € 1.495 | Tariffe Lazio (SAN_DCA_U00411_13_09_2017) 21 |
| **Post-progression state costs** | everolimus + exemestane | € 1.853 | FARMADATI Italia software Tunnel® 19 |
| chemotherapy | € 540 | FARMADATI Italia software Tunnel® 19 Tariffario Nomenclatore 17 |
| hormone monotherapy | € 26 | FARMADATI Italia software Tunnel®19 |
| **Visits unit costs** | Visit | € 16 | Tariffario Nomenclatore 17 |
| Exams | € 6 | Tariffario Nomenclatore 17 |
| ECG | € 12 | Tariffario Nomenclatore 17 |
| Community nurse | € 31 | Supplemento ordinario n 38/l alla Gazzetta Ufficiale Serie Generale n 201 del 29/8/2016 20 |
| GP home visit | € 0 | KOL – expert opinion |
| Therapist visit | € 19 | Tariffario Nomenclatore 17 |
| **Laboratory tests and scans** | Blood Count | € 3 | Tariffario Nomenclatore 17 |
| Functionality exams | € 2 | Tariffario Nomenclatore 17 |
| ECG | € 12 | Tariffario Nomenclatore 17 |
| TAC | € 78 | Tariffario Nomenclatore 17 |
